# Supplementary material
Source: Springer Nature journal article supplement (https://www.springermedizin.de/resource/supplementary/12943_2014_1392_MOESM4_ESM.pdf/9552870)

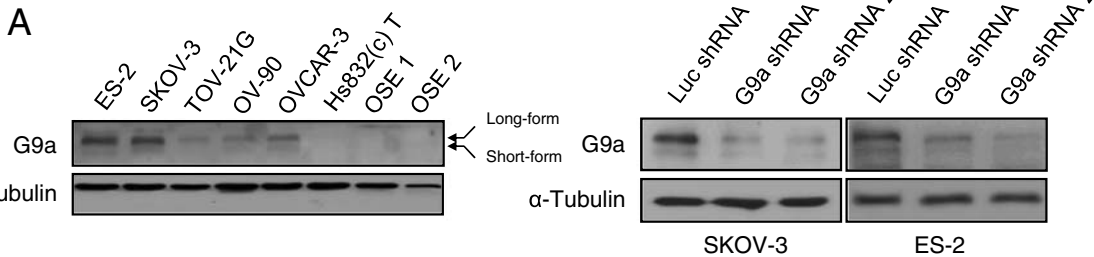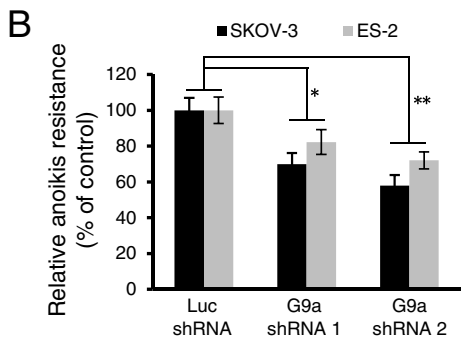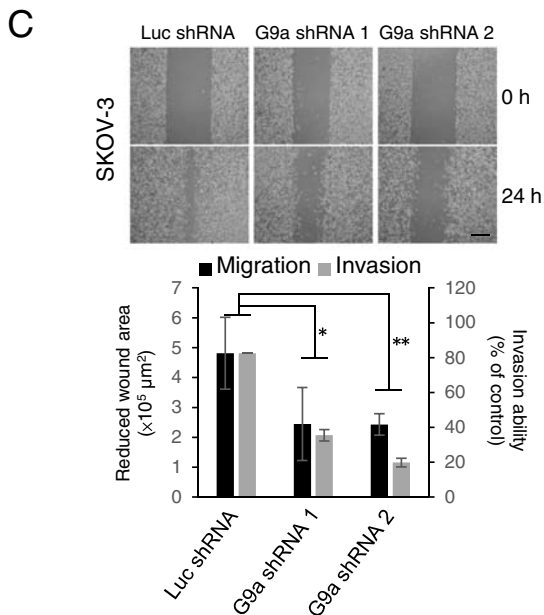

**D**

|                 |   |   |   |   |   |
|-----------------|---|---|---|---|---|
| Luc shRNA       | + | - | - | - | - |
| G9a shRNA 3'UTR | - | + | + | + | + |
| Vector          | + | + | - | - | - |
| Short-form G9a  | - | - | + | - | + |
| Long-form G9a   | - | - | - | + | + |

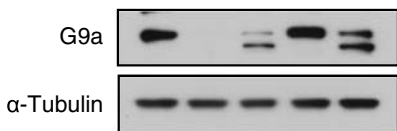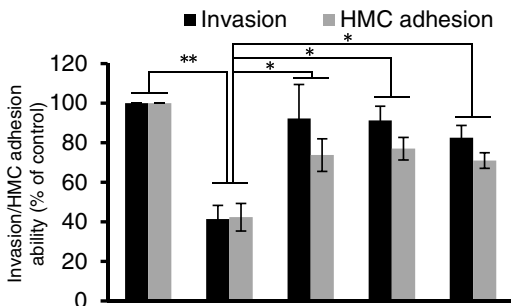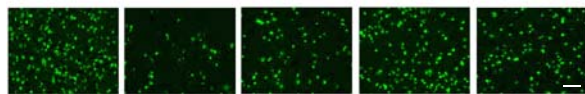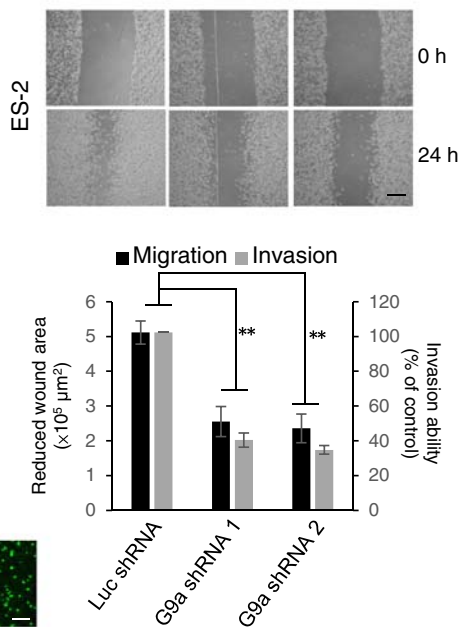

Supplement: MOESM4 [file 9552870]
